# Supplementary material
Source: Springer Nature journal article supplement (https://www.springermedizin.de/resource/supplementary/13075_2012_3645_MOESM10_ESM.pdf/9695004)

**A**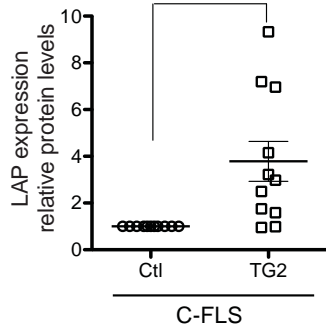**B**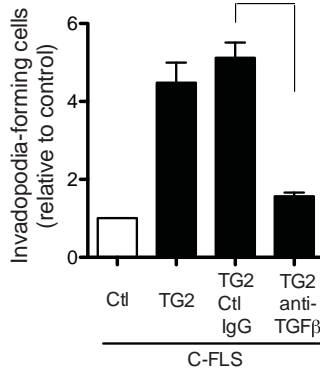**C**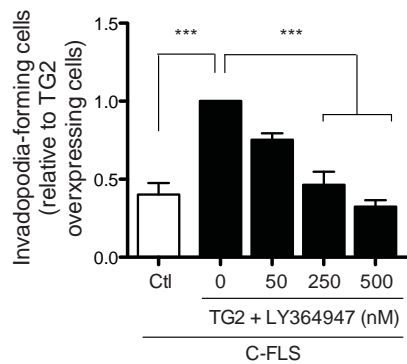**D**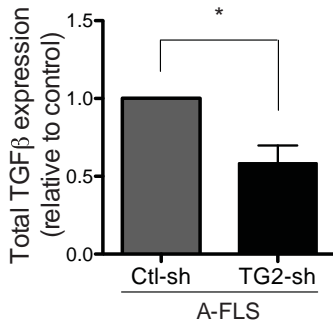**E**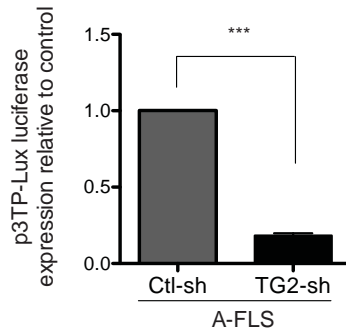

Supplement: MOESM10 [file 9695004]
